# Supplementary material
Source: publisher figshare collection journal article supplement (https://tandf.figshare.com/articles/dataset/_/4570207)
Supplement: Supplementary file 1 [file 1]

## Sheet: Sheet1
Additional File 2: Table S2. The 74 differentially methylated regions (DMRs; P<0.05).
Chr.	Start Position	End Position	Region Width (bp)	CpG Count	Lean Mean Methyl	Obese Mean Methyl	Methyl Difference	Area Stat	Gene	Genic Region	CpG Island Region	Transcript
chr1	247694207	247694247	41	13	29.3777	65.9159	36.5382	36.2971	LOC148824,OR2C3	Promoter	CpG Island	NR_027309,NM_198074
chr12	130766091	130766237	147	11	72.141	49.3934	-22.7476	-26.2723	-	Intergenic	InterCpG	-
chr8	143781655	143781697	43	12	50.9055	32.6738	-18.2317	-26.0211	LY6K	5'UTR	CpG Island	NM_001160355;NM_017527;NM_001160354
chr6	32427780	32427869	90	9	41.6948	67.7715	26.0766	23.9701	-	Intergenic	InterCpG	-
chr11	63530710	63530750	41	8	80.1408	37.3856	-42.7552	-23.6053	C11orf95	3'UTR	CpG Island	NM_001144936
chr8	1113348	1113379	32	10	53.3846	75.1591	21.7744	23.5571	-	Intergenic	CpG Island	-
chr6	3771940	3771981	42	11	67.685	49.5755	-18.1096	-23.4703	-	Intergenic	InterCpG	-
chr6	10660129	10660155	27	9	69.4862	84.0315	14.5454	20.281	-	Intergenic	InterCpG	-
chr2	29179712	29179812	101	7	83.5265	44.7577	-38.7689	-20.1157	-	Intergenic	InterCpG	-
chr21	46957915	46958001	87	7	70.4327	35.534	-34.8988	-18.8874	SLC19A1	5'UTR	CpG Island,South Shore	NM_194255
chr13	27295918	27295996	79	9	14.2503	3.67569	-10.5746	-18.6124	-	Intergenic	InterCpG	-
chr10	2544080	2544114	35	9	60.4702	33.9867	-26.4835	-18.218	-	Intergenic	CpG Island	-
chr12	11700344	11700501	158	8	93.6184	65.886	-27.7324	-18.2081	LOC338817	Intergenic	InterCpG	NR_033890
chr19	1287750	1287781	32	10	28.401	42.7118	14.3108	17.752	EFNA2	Intron	CpG Island	NM_001405
chr3	183888272	183888326	55	9	79.026	91.7622	12.7362	17.4881	AP2M1,DVL3	Exon	CpG Island	NM_004068;NM_001025205,NM_004423
chr7	534013	534037	25	7	69.7765	89.8043	20.0278	16.6168	-	Intergenic	CpG Island	-
chr7	15587249	15587280	32	8	91.2601	74.308	-16.9521	-16.2975	TMEM195	Intron	InterCpG	NM_001004320
chr12	11700195	11700258	64	12	96.5081	81.9098	-14.5983	-16.2924	LOC338817	Intergenic	InterCpG	NR_033890
chr3	197884102	197884159	58	7	19.129	39.0074	19.8784	15.9297	FAM157A	Intron	North Shore,CpG Island	NM_001145248
chr9	124988556	124988604	49	8	63.7431	34.7417	-29.0014	-15.8002	LHX6	Intron	CpG Island	NM_014368;NM_199160
chr10	13200519	13200559	41	13	42.1448	52.6493	10.5045	15.5425	MCM10	Intergenic	North Shelf	NM_018518;NM_182751
chr7	15587347	15587374	28	7	80.726	60.8221	-19.9039	-15.3914	TMEM195	Intron	InterCpG	NM_001004320
chr6	11154457	11154589	133	6	55.4338	30.1273	-25.3064	-15.2862	-	Intergenic	InterCpG	-
chr12	11700523	11700579	57	7	94.4618	72.6066	-21.8552	-14.4834	LOC338817	Intergenic	InterCpG	NR_033890
chr19	39056313	39056362	50	8	9.79193	2.97065	-6.82128	-14.4834	RYR1	Exon	CpG Island	NM_001042723;NM_000540
chr17	18024091	18024117	27	9	59.4236	73.5688	14.1452	14.0695	MYO15A	Exon	CpG Island	NM_016239
chr17	80840781	80840813	33	9	45.1716	32.7679	-12.4037	-13.7747	TBCD	Intron	InterCpG	NM_005993
chr22	46457352	46457372	21	7	35.08	53.6911	18.6111	13.4877	-	Intergenic	CpG Island	-
chr13	23501157	23501190	34	6	8.73615	26.2027	17.4665	13.4094	-	Intergenic	CpG Island	-
chr20	44829753	44829791	39	6	32.6973	18.7837	-13.9136	-12.6988	CDH22	Intron	CpG Island	NM_021248
chr11	315794	315818	25	7	70.3569	56.8015	-13.5554	-12.5234	-	Intergenic	CpG Island	-
chr21	35831851	35831882	32	8	9.83666	3.55828	-6.27838	-12.2054	KCNE1	5'UTR	CpG Island	NM_001127670;NM_000219;NM_001127669;NM_001127668
chr4	83353917	83353939	23	5	54.6942	73.5653	18.8711	12.0999	HNRPDL,ENOPH1	5'UTR	South Shore	NR_003249;NM_031372,NM_021204
chr11	49873827	49873848	22	6	35.2788	56.3733	21.0945	12.0619	-	Intergenic	CpG Island	-
chr2	3642629	3642661	33	6	24.6794	43.3138	18.6344	11.3705	COLEC11	5'UTR	CpG Island	NM_024027;NM_199235
chr13	23501266	23501299	34	5	7.95596	25.8319	17.8759	11.3401	-	Intergenic	CpG Island	-
chr7	137831775	137831817	43	5	49.4713	25.8921	-23.5793	-10.6212	-	Intergenic	InterCpG	-
chr22	46326948	46326986	39	7	30.3444	54.4348	24.0904	10.5687	WNT7B	Exon	CpG Island	NM_058238
chr2	85839909	85839941	33	7	75.2395	86.8108	11.5713	10.5594	C2orf68,USP39	Promoter	South Shore	NM_001013649,NM_006590
chr7	533608	533635	28	6	73.3727	86.725	13.3523	10.4978	-	Intergenic	CpG Island	-
chr14	51974877	51974898	22	5	32.2328	15.8849	-16.348	-10.3559	FRMD6	5'UTR	InterCpG	NM_001042481
chr12	132627849	132627885	37	6	38.7967	17.9646	-20.8322	-10.2152	DDX51,NOC4L	Promoter	North Shore,CpG Island	NM_175066,NM_024078
chr6	170452056	170452076	21	5	72.7265	89.2417	16.5152	9.99598	-	Intergenic	CpG Island	-
chr7	5396337	5396365	29	5	70.6516	92.3997	21.748	9.97171	TNRC18	Intron	South Shore	NM_001080495
chr2	47666518	47666542	25	5	26.8523	44.6821	17.8297	9.9514	MSH2	Intron	InterCpG	NM_000251
chr20	57042588	57042627	40	7	49.2111	38.9557	-10.2554	-9.89842	APCDD1L	Exon	CpG Island	NM_153360
chr16	85170516	85170546	31	11	81.4274	63.4635	-17.9639	-9.78137	LOC400548	Intergenic	North Shore	NR_033984
chr6	30860015	30860107	93	5	58.6684	74.3863	15.718	9.74293	DDR1	Intron,Exon	InterCpG	NM_013994;NM_001954;NM_013993
chr20	36923354	36923376	23	6	62.3497	77.3379	14.9882	9.64682	-	Intergenic	InterCpG	-
chr10	114772692	114772712	21	5	54.7179	66.7078	11.9898	9.04	TCF7L2	Intron	InterCpG	NM_030756;NM_001198527;NM_001198529;NM_001146285;NM_001146286;NM_001198525;NM_001198526;NM_001198528;NM_001146274;NM_001198531;NM_001146284;NM_001146283;NM_001198530
chr1	112933101	112933126	26	5	54.2659	74.8596	20.5938	8.92885	-	Intergenic	InterCpG	-
chr12	57083548	57083570	23	5	36.1863	20.5983	-15.588	-8.88473	PTGES3	Promoter	South Shore	NM_006601
chr1	204320201	204320229	29	4	21.4356	9.2568	-12.1788	-8.81086	PLEKHA6	5'UTR	InterCpG	NM_014935
chr3	58324505	58324554	50	4	51.2467	72.1049	20.8581	8.58261	PXK	5'UTR	InterCpG	NM_017771
chr20	62427581	62427607	27	5	29.5624	19.3947	-10.1678	-8.54609	ZBTB46	5'UTR	InterCpG	NM_025224
chr20	3146200	3146231	32	4	45.3688	29.2738	-16.095	-8.49684	ProSAPiP1	Exon	South Shore	NM_014731
chr10	135123764	135123816	53	4	64.5702	77.1544	12.5842	8.14701	ZNF511,TUBGCP2	Promoter	South Shore	NM_145806,NM_006659
chr12	124014862	124017633	2772	4	25.358	38.0162	12.6583	8.09766	RILPL1,MIR3908	Intron	North Shelf,CpG Island	NM_178314,NR_037470
chr5	180086345	180086366	22	4	49.6632	34.8707	-14.7925	-7.8367	-	Intergenic	InterCpG	-
chr6	28058929	28058969	41	4	19.8174	10.2801	-9.53734	-7.55396	ZSCAN12P1	Exon	InterCpG	NR_024063
chr21	47789974	47790018	45	4	49.1611	38.0828	-11.0783	-7.19496	PCNT	Intron	InterCpG	NM_006031
chr21	45450959	45450988	30	5	57.2826	66.9166	9.63403	7.01711	TRAPPC10	Intron	InterCpG	NM_003274
chr11	124622074	124622096	23	5	86.6548	78.3657	-8.28914	-6.89858	VSIG2	5'UTR	InterCpG	NM_014312
chr10	34642112	34642132	21	5	85.595	93.7016	8.1066	6.80903	PARD3	Intron	InterCpG	NM_001184785;NM_001184787;NM_001184794;NM_019619;NM_001184792;NM_001184786;NM_001184788;NM_001184793;NM_001184791;NM_001184789;NM_001184790
chr20	44658384	44658407	24	5	12.7928	23.0213	10.2285	6.75373	SLC12A5	Intron	CpG Island	NM_020708;NM_001134771
chr14	21128127	21128162	36	4	50.3069	43.6227	-6.68425	-4.47993	-	Intergenic	InterCpG	-
chr17	78165772	78165805	34	5	39.4485	33.3747	-6.07381	-3.99011	CARD14	Intron	South Shore	NM_052819;NM_024110
chr10	120459406	120459451	46	6	79.3556	75.479	-3.87659	-3.61945	C10orf46	Intron	InterCpG	NM_153810
chr2	241232742	241233057	316	5	67.6035	73.7041	6.1006	2.15308	-	Intergenic	InterCpG	-
chr21	45574057	45574078	22	5	8.20214	5.74313	-2.45901	-1.62371	-	Intergenic	North Shore	-
chr16	6049659	6049687	29	4	90.7421	88.8369	-1.90511	-1.48035	-	Intergenic	InterCpG	-
chr1	228074468	228074497	30	7	30.3497	18.1656	-12.1841	-1.27629	-	Intergenic	North Shore	-
chr22	42692513	42692537	25	7	13.9671	12.6182	-1.34892	-1.16816	-	Intergenic	InterCpG	-
chr1	919910	920225	316	5	47.2582	47.0186	-0.239659	-0.040627	C1orf170	Intergenic	CpG Island	NR_027693
